# Supplementary material for: Private Selective Sweeps Identified from Next-Generation Pool-Sequencing Reveal Convergent Pathways under Selection in Two Inbred Schistosoma mansoni Strains
Source: PubMed Central journal article supplement (PMC3861164; doi:10.1371/journal.pntd.0002591), 2013-12-12

Figure S1

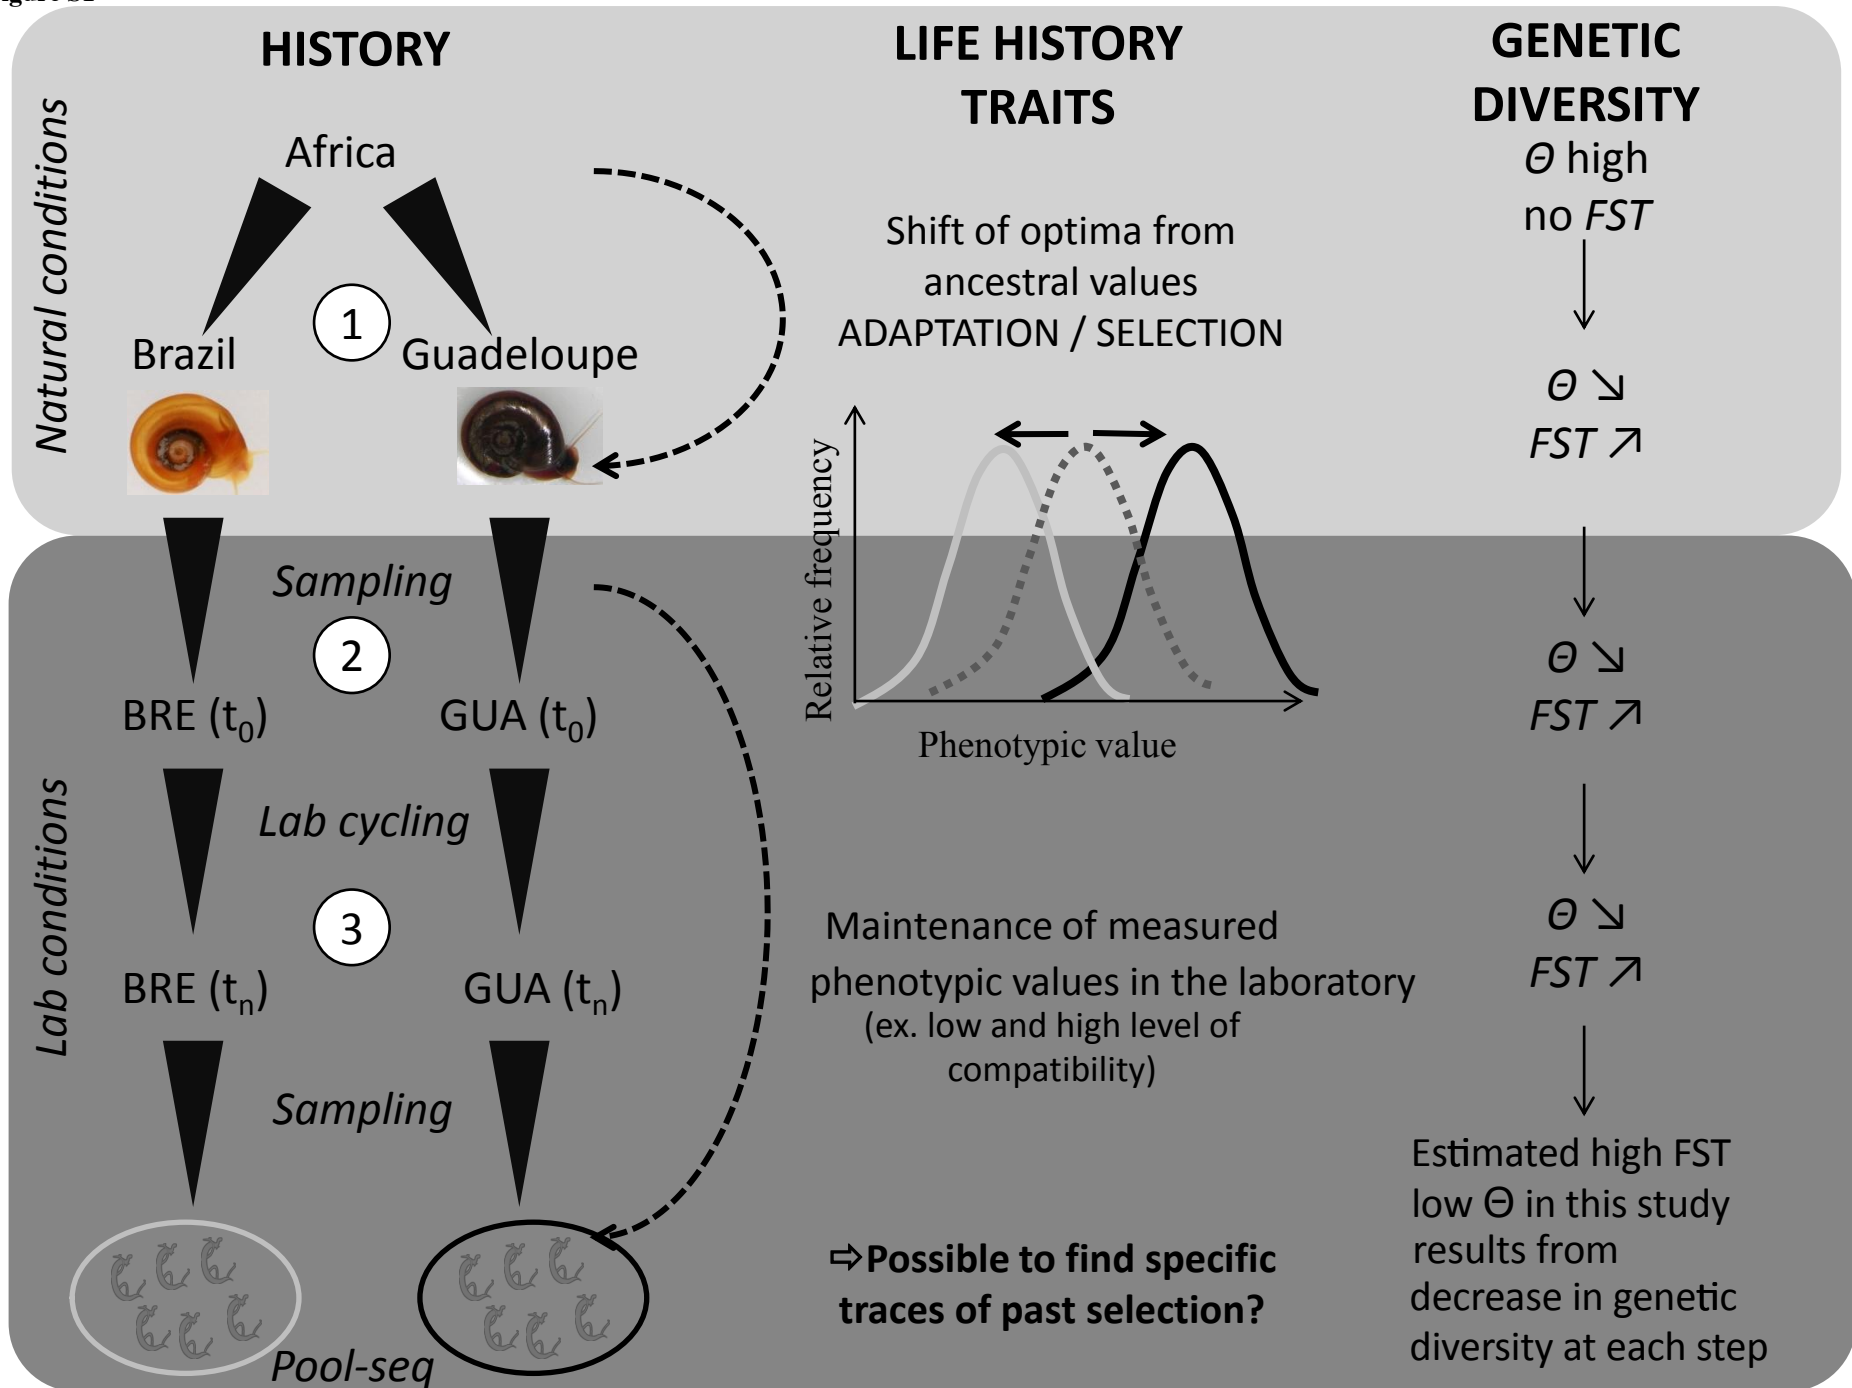

Supplement: pntd.0002591.s001.pdf [file pntd.0002591.s001.pdf]
