# Supplementary material for: Private Selective Sweeps Identified from Next-Generation Pool-Sequencing Reveal Convergent Pathways under Selection in Two Inbred Schistosoma mansoni Strains
Source: PubMed Central journal article supplement (PMC3861164; doi:10.1371/journal.pntd.0002591), 2013-12-12

**Figure S3A**

**CHROMOSOME 1**

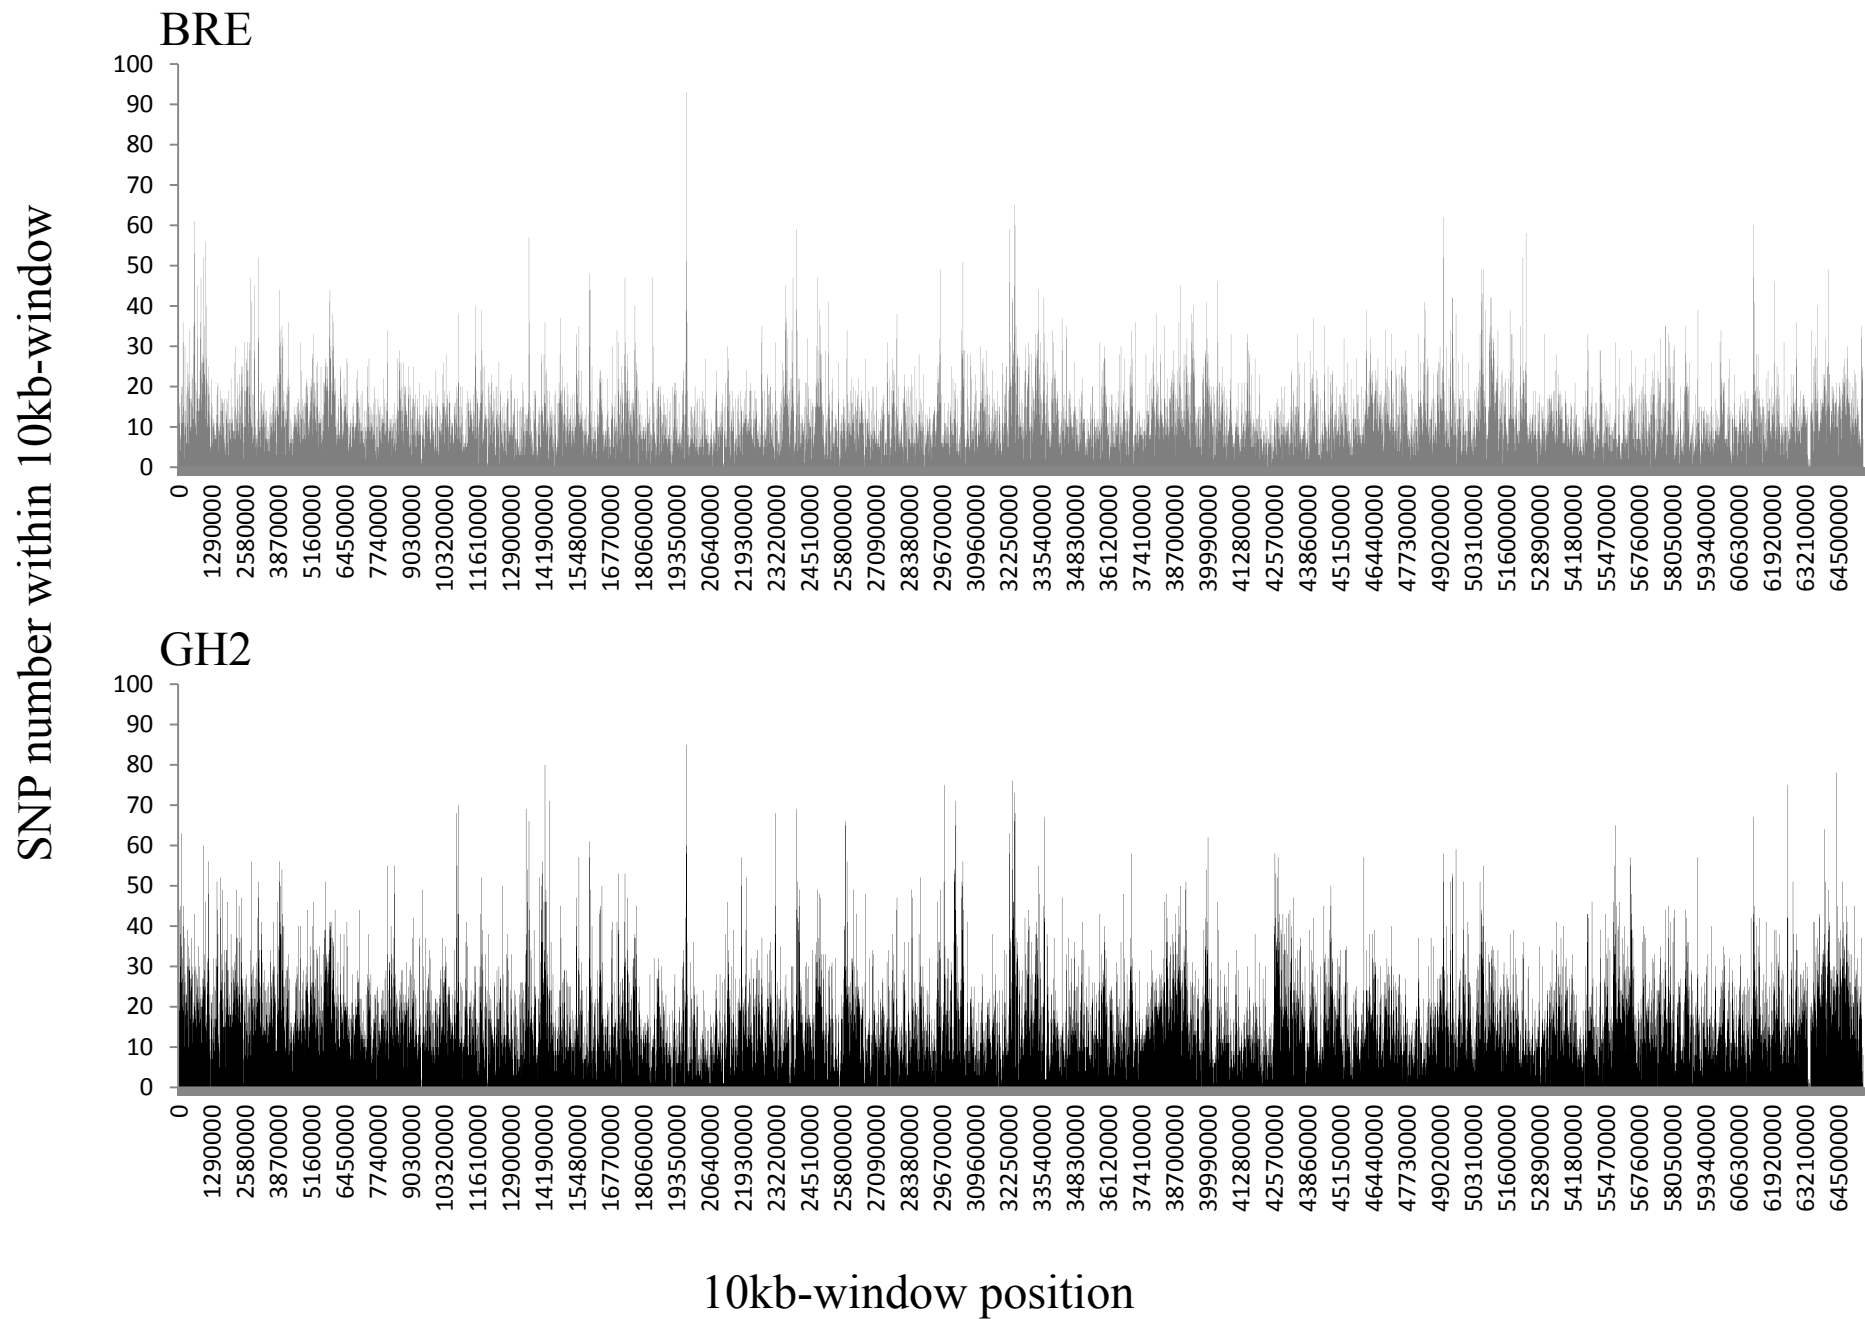

**Figure S3 B**

**CHROMOSOME 2**

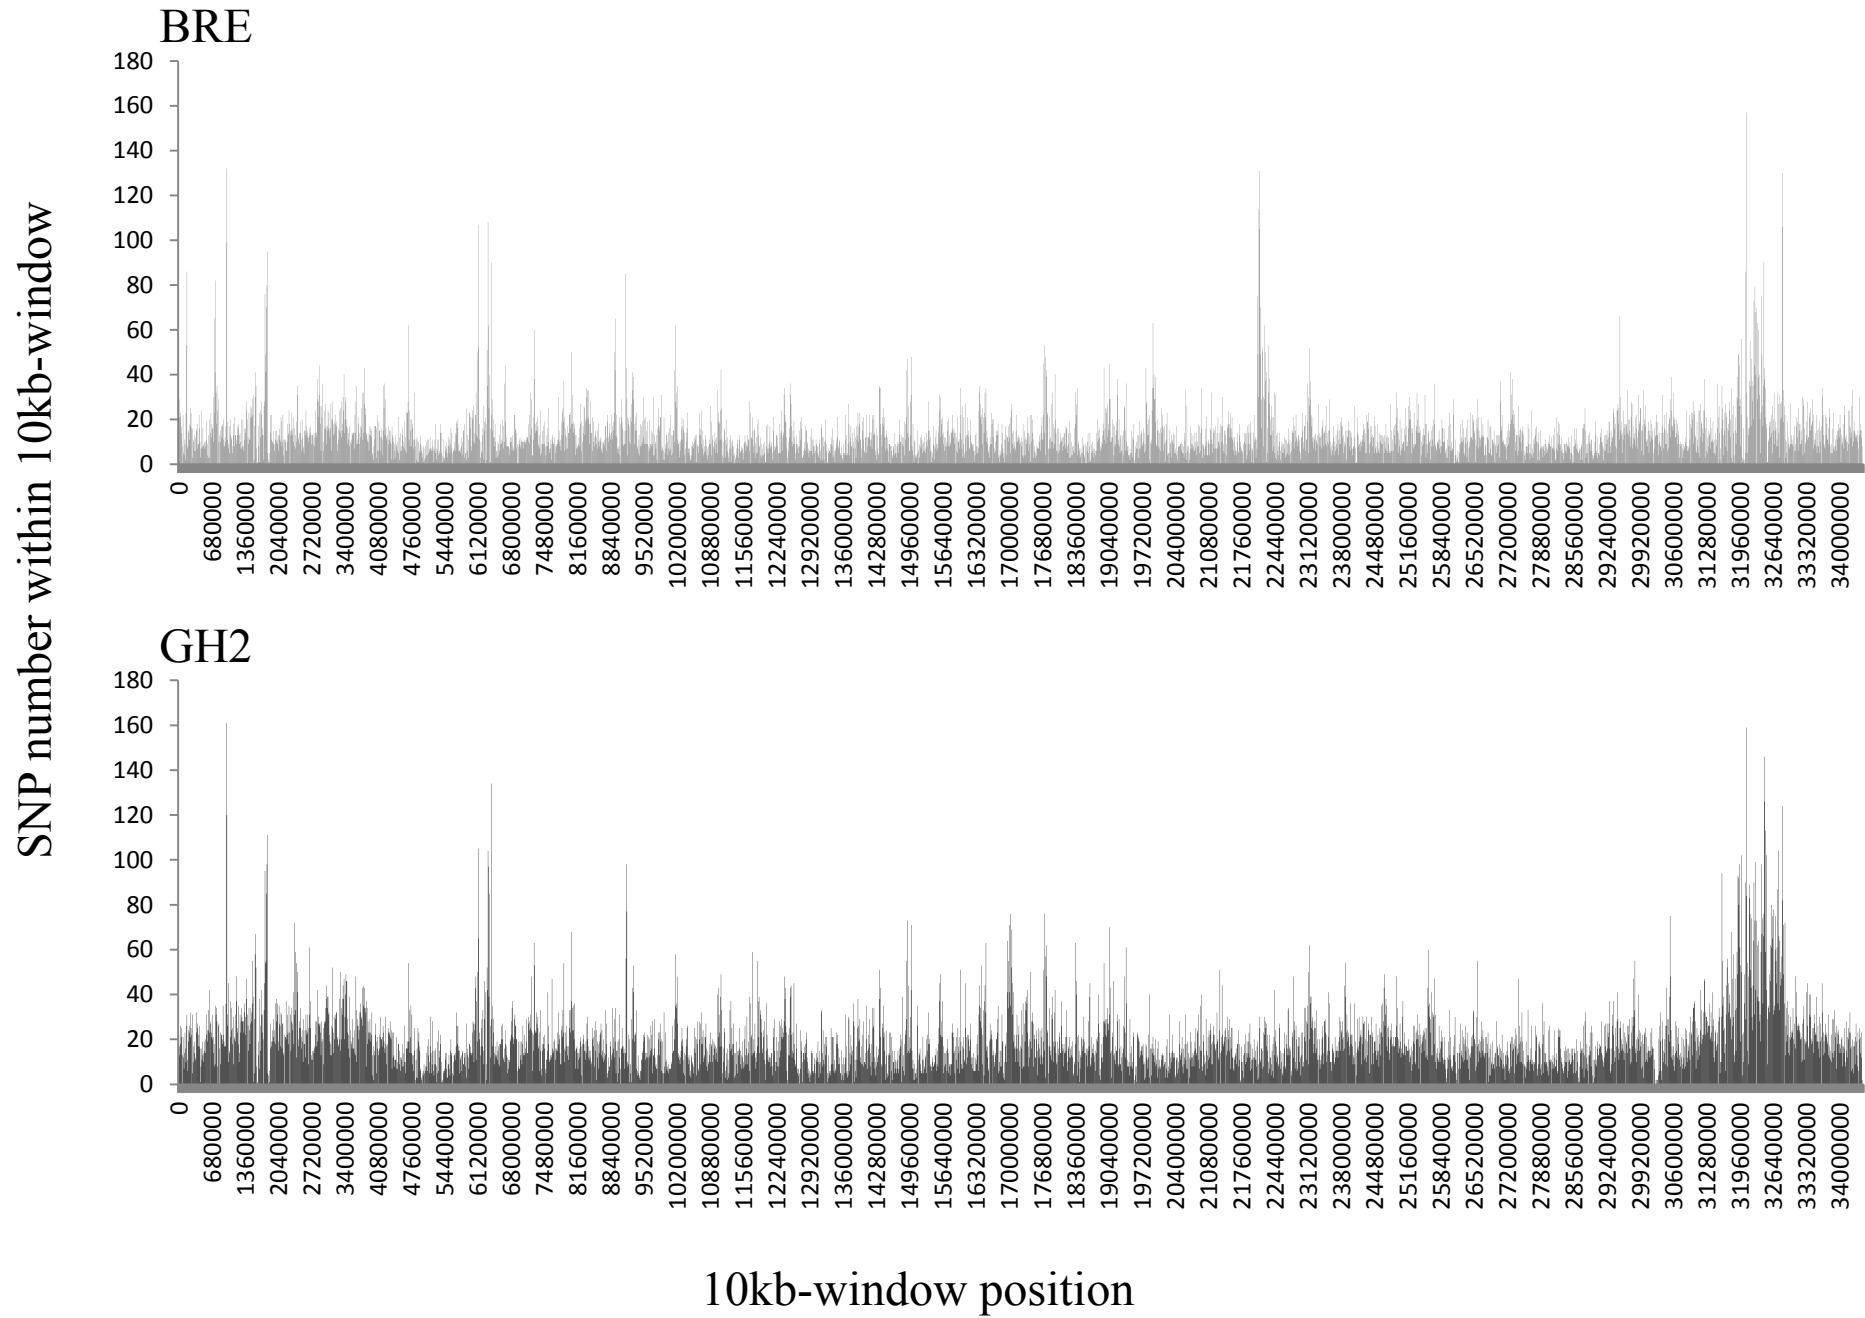

**Figure S3 C**

# CHROMOSOME 3

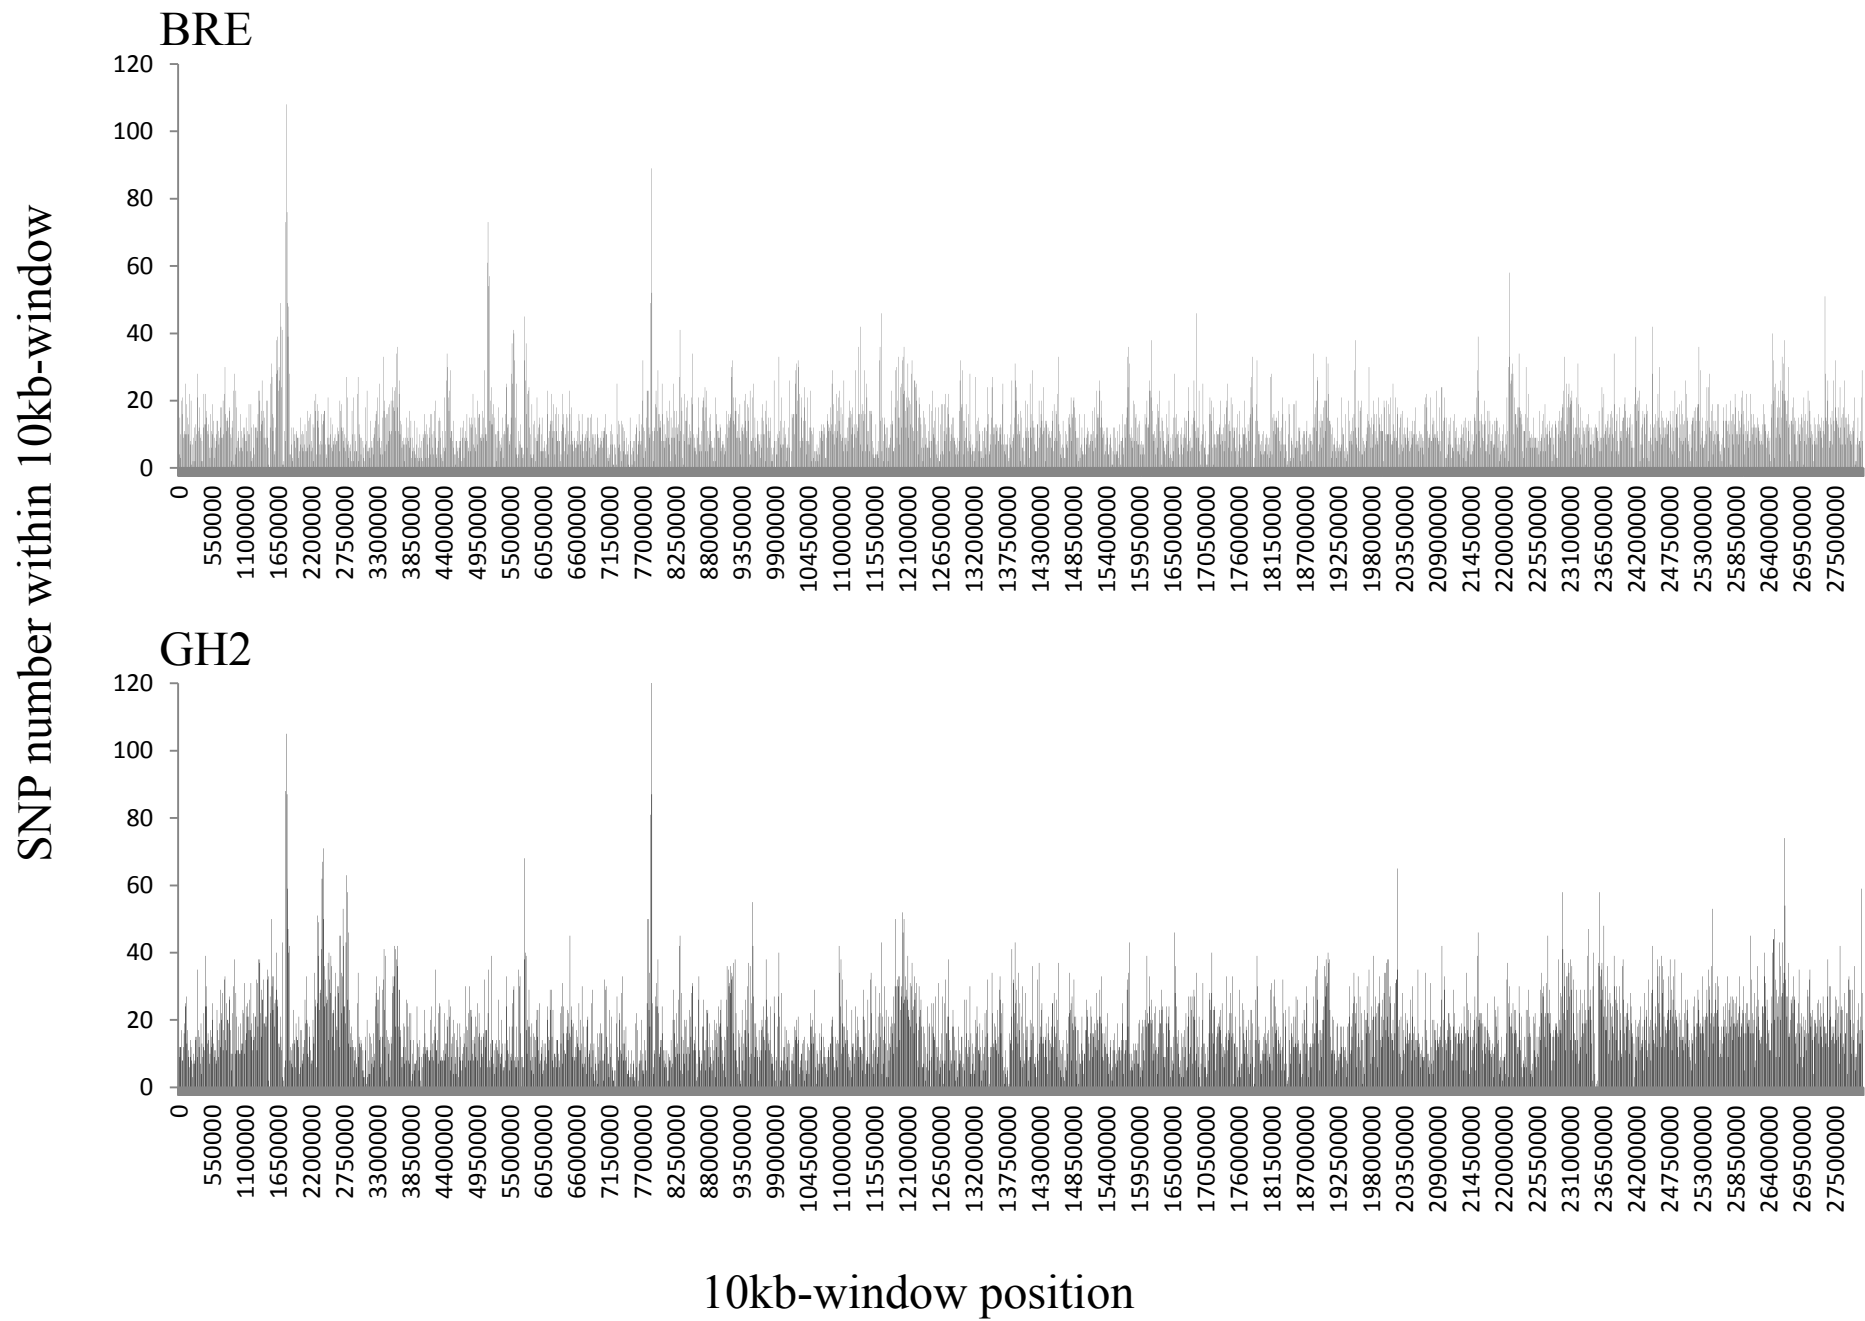

**Figure S3D**

**CHROMOSOME 4**

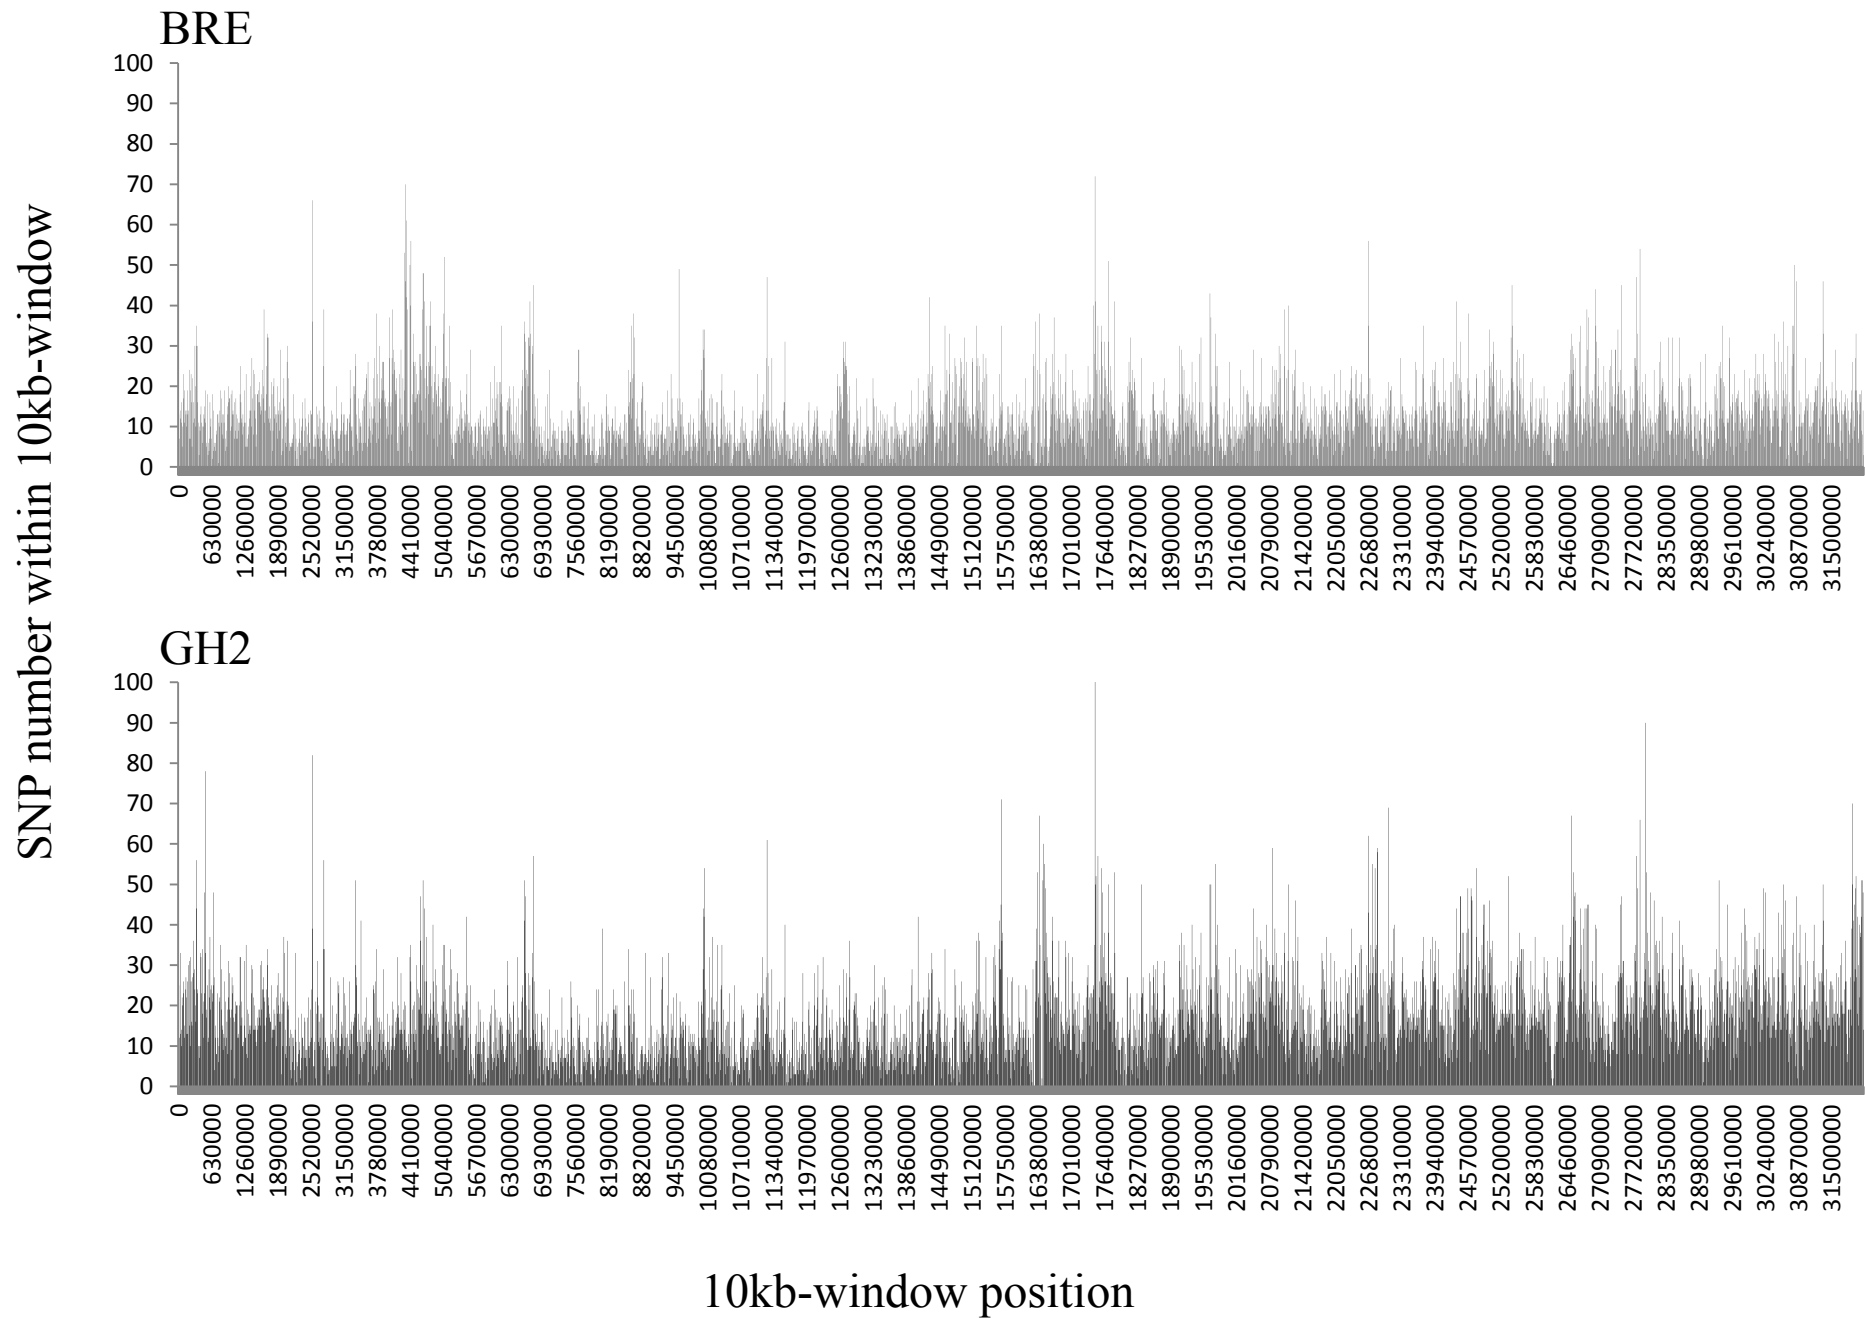

**Figure S3E**

**CHROMOSOME 5**

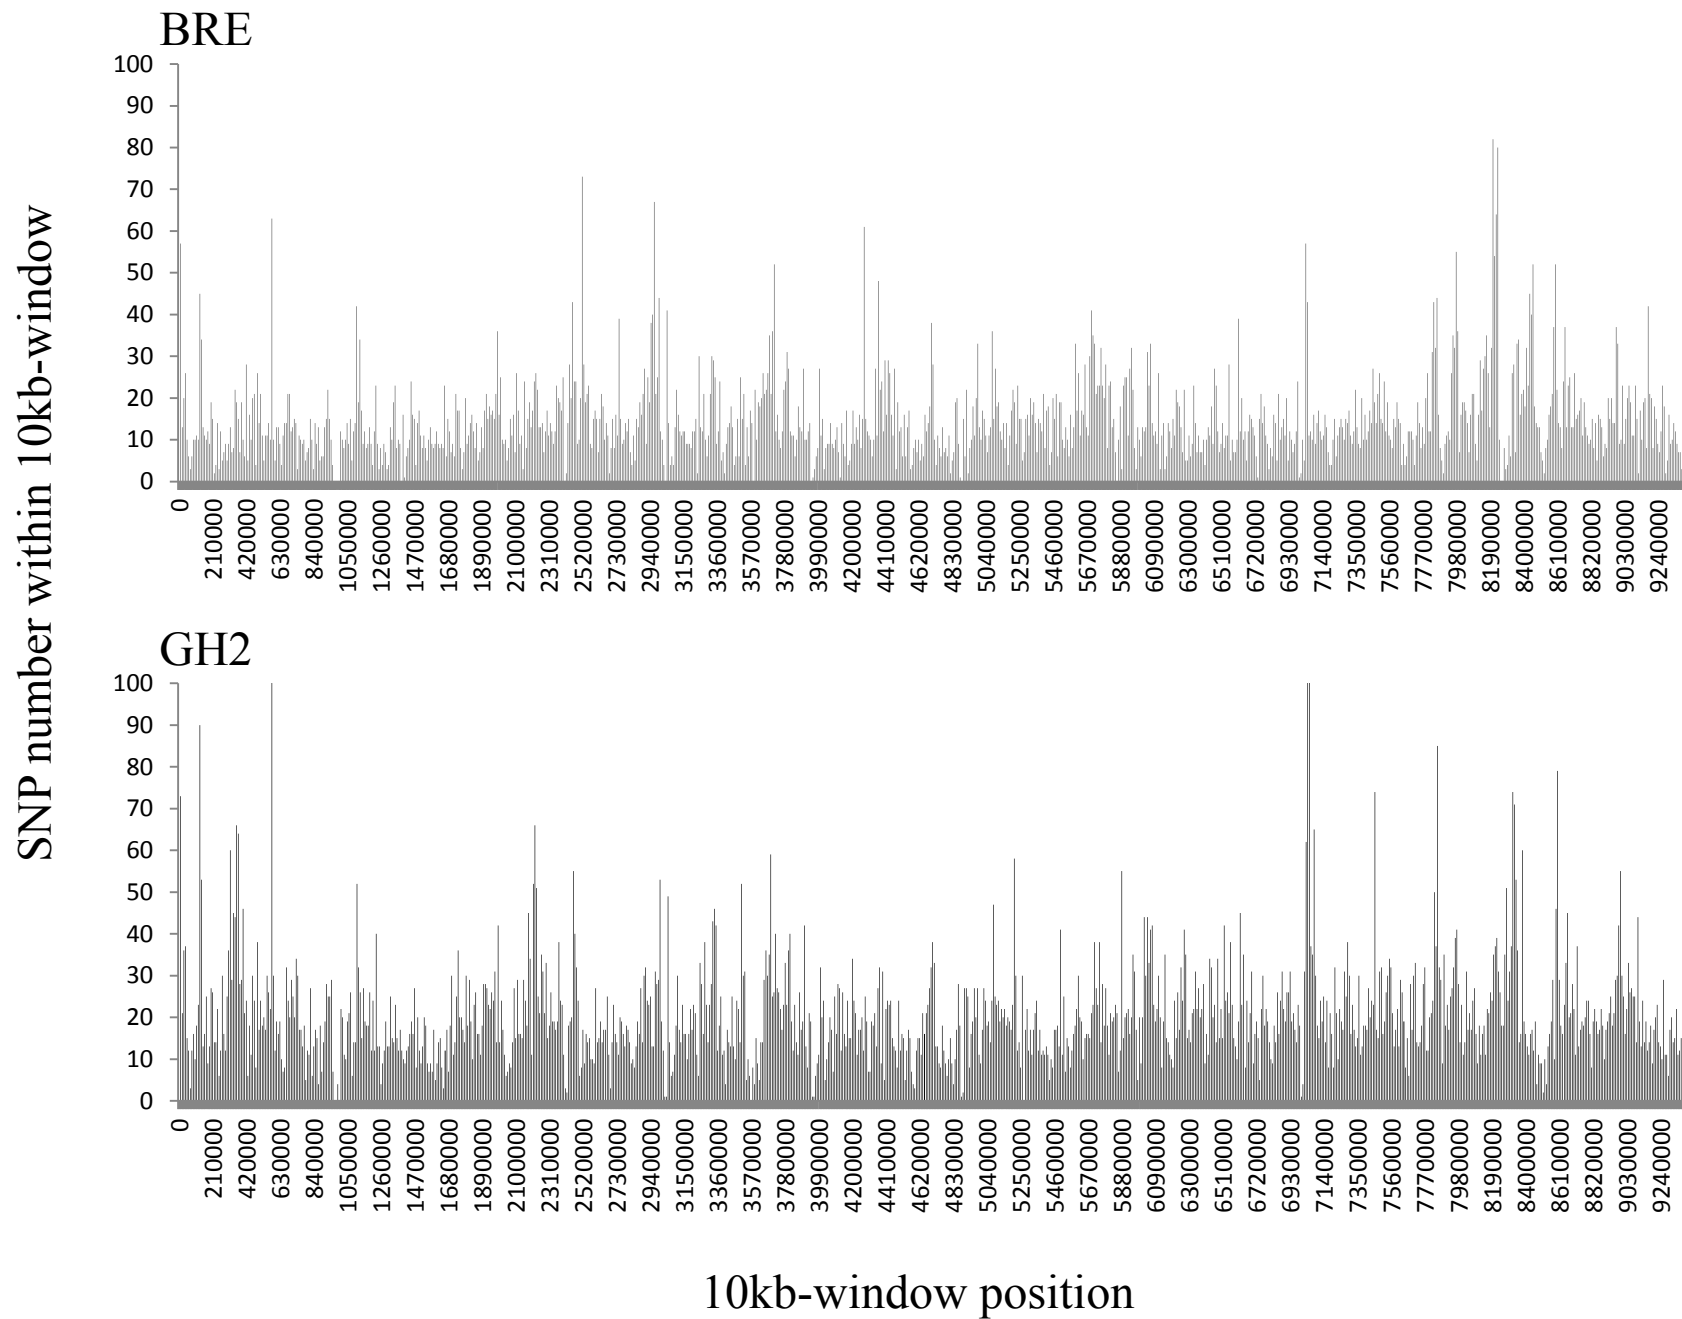

**Figure S3 F**

**CHROMOSOME 6**

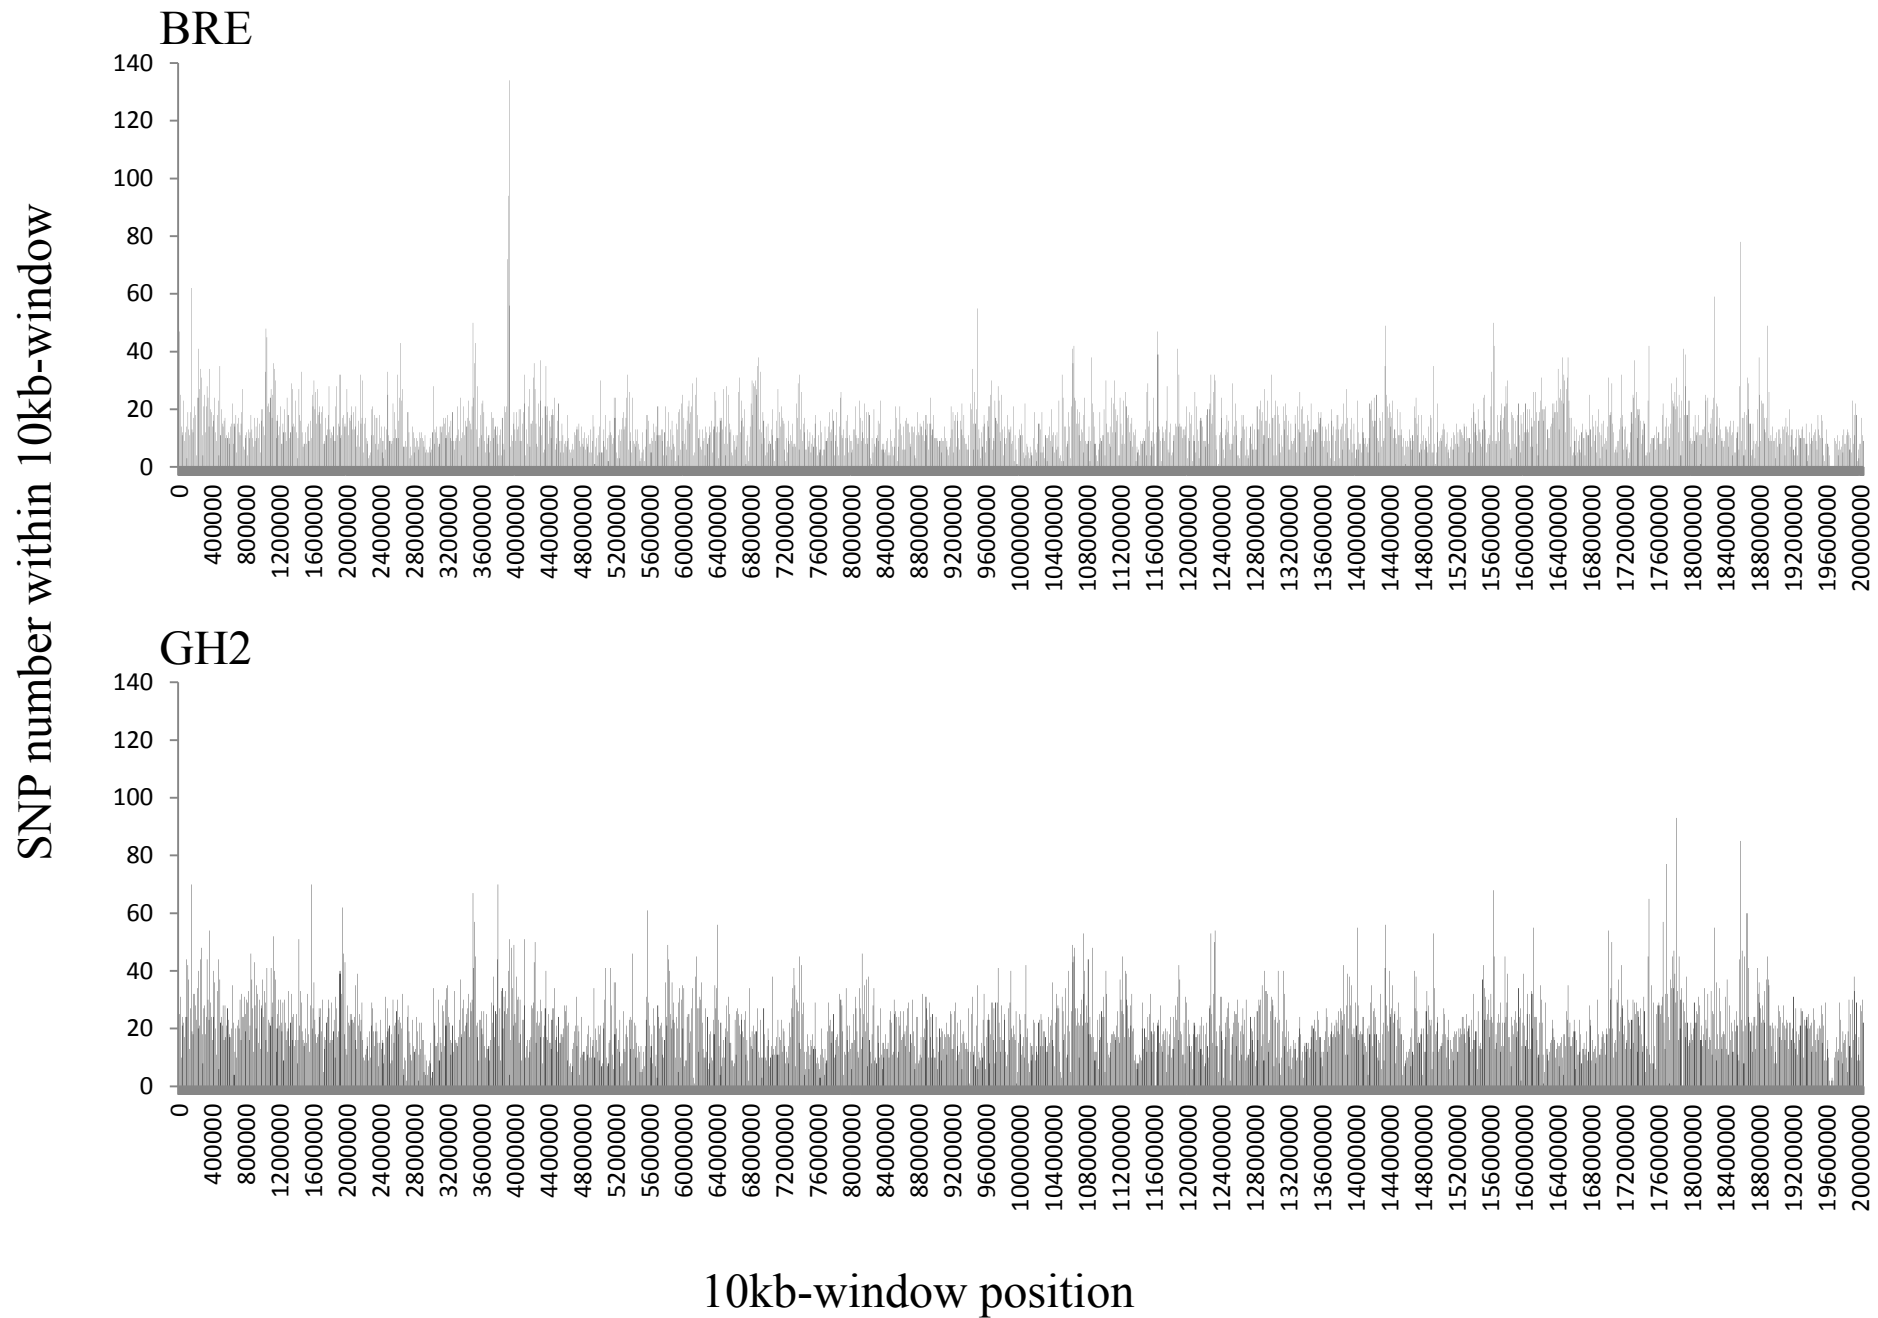

**Figure S3G**

**CHROMOSOME 7**

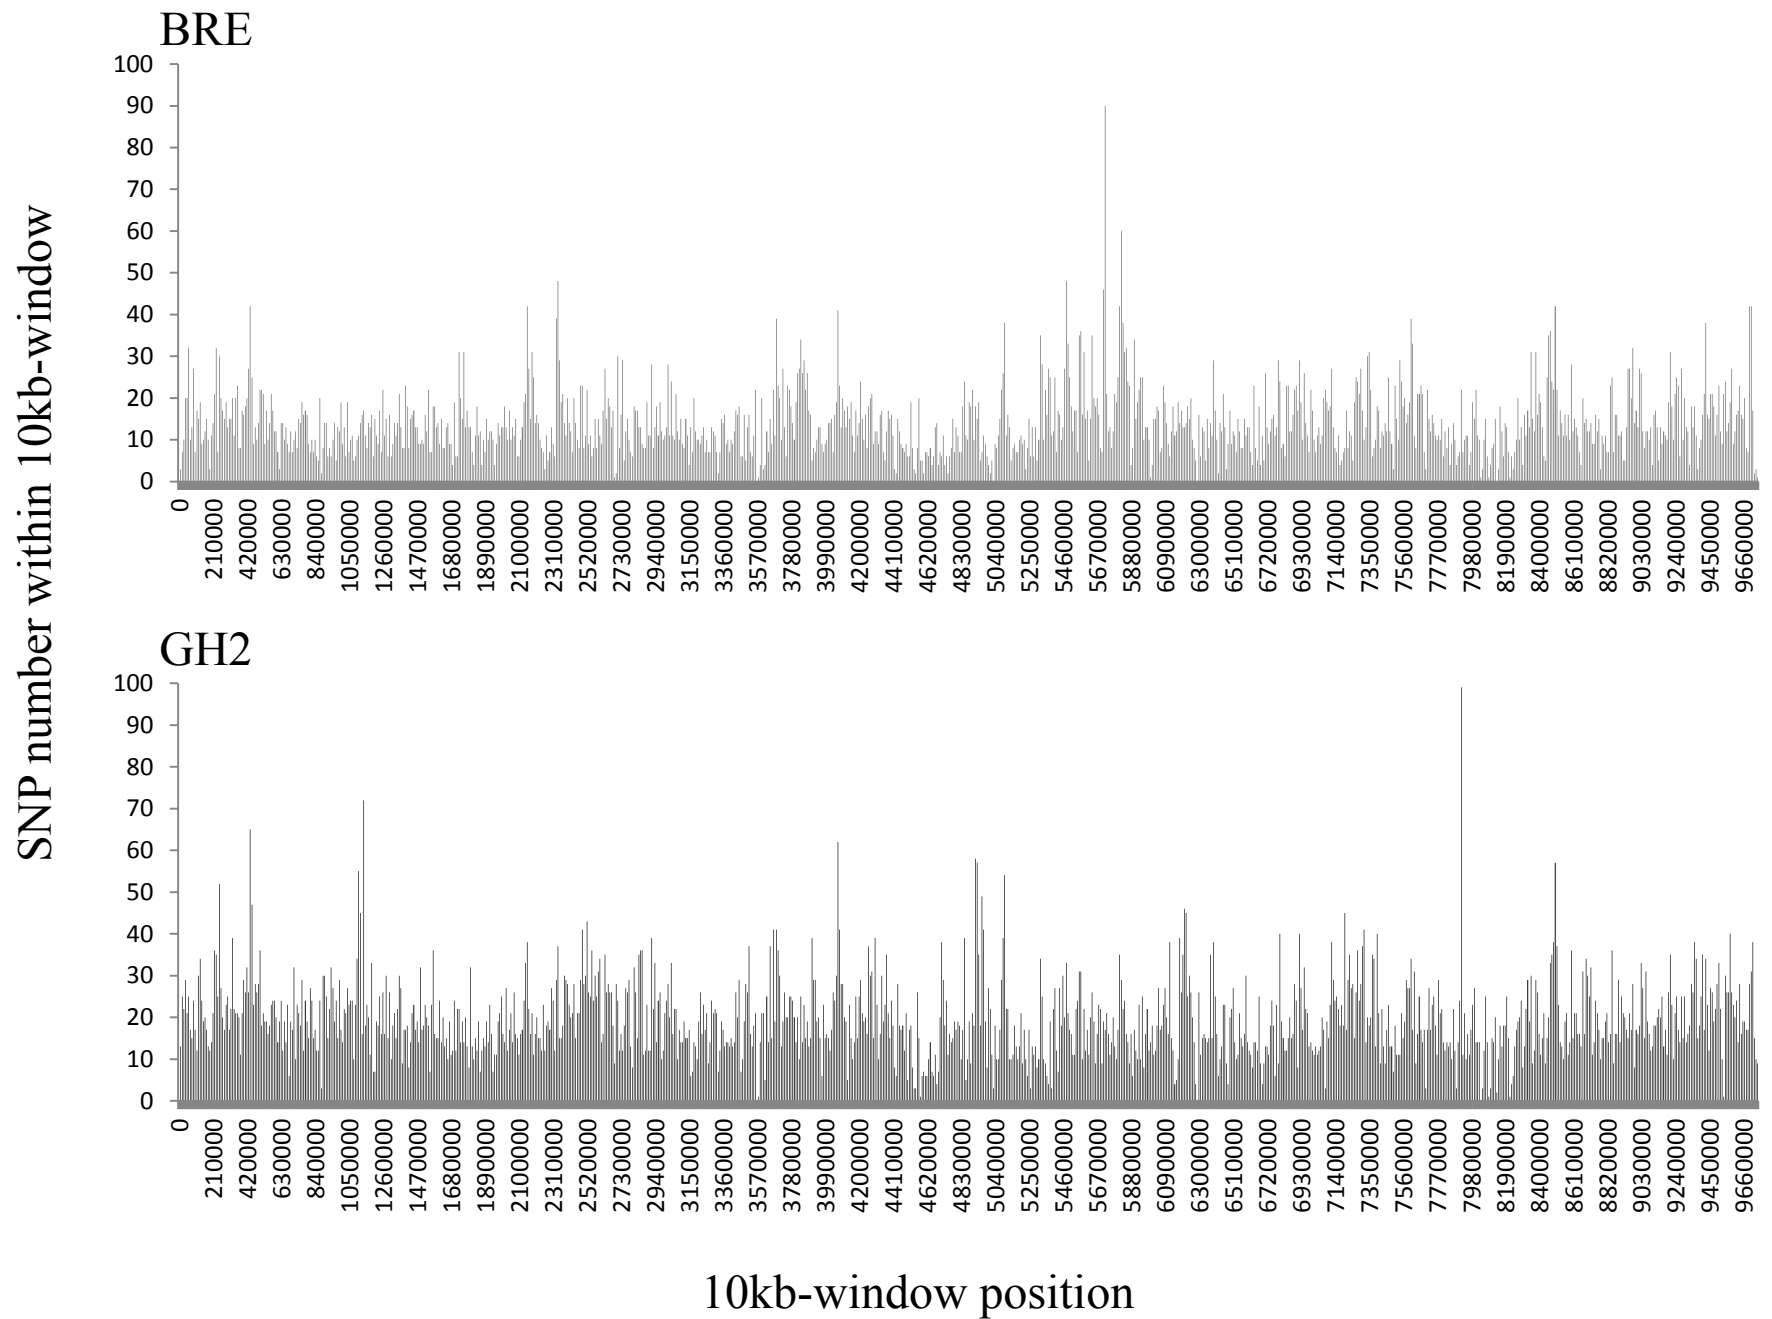

**Figure S3 H**

**SEX CHROMOSOMES**

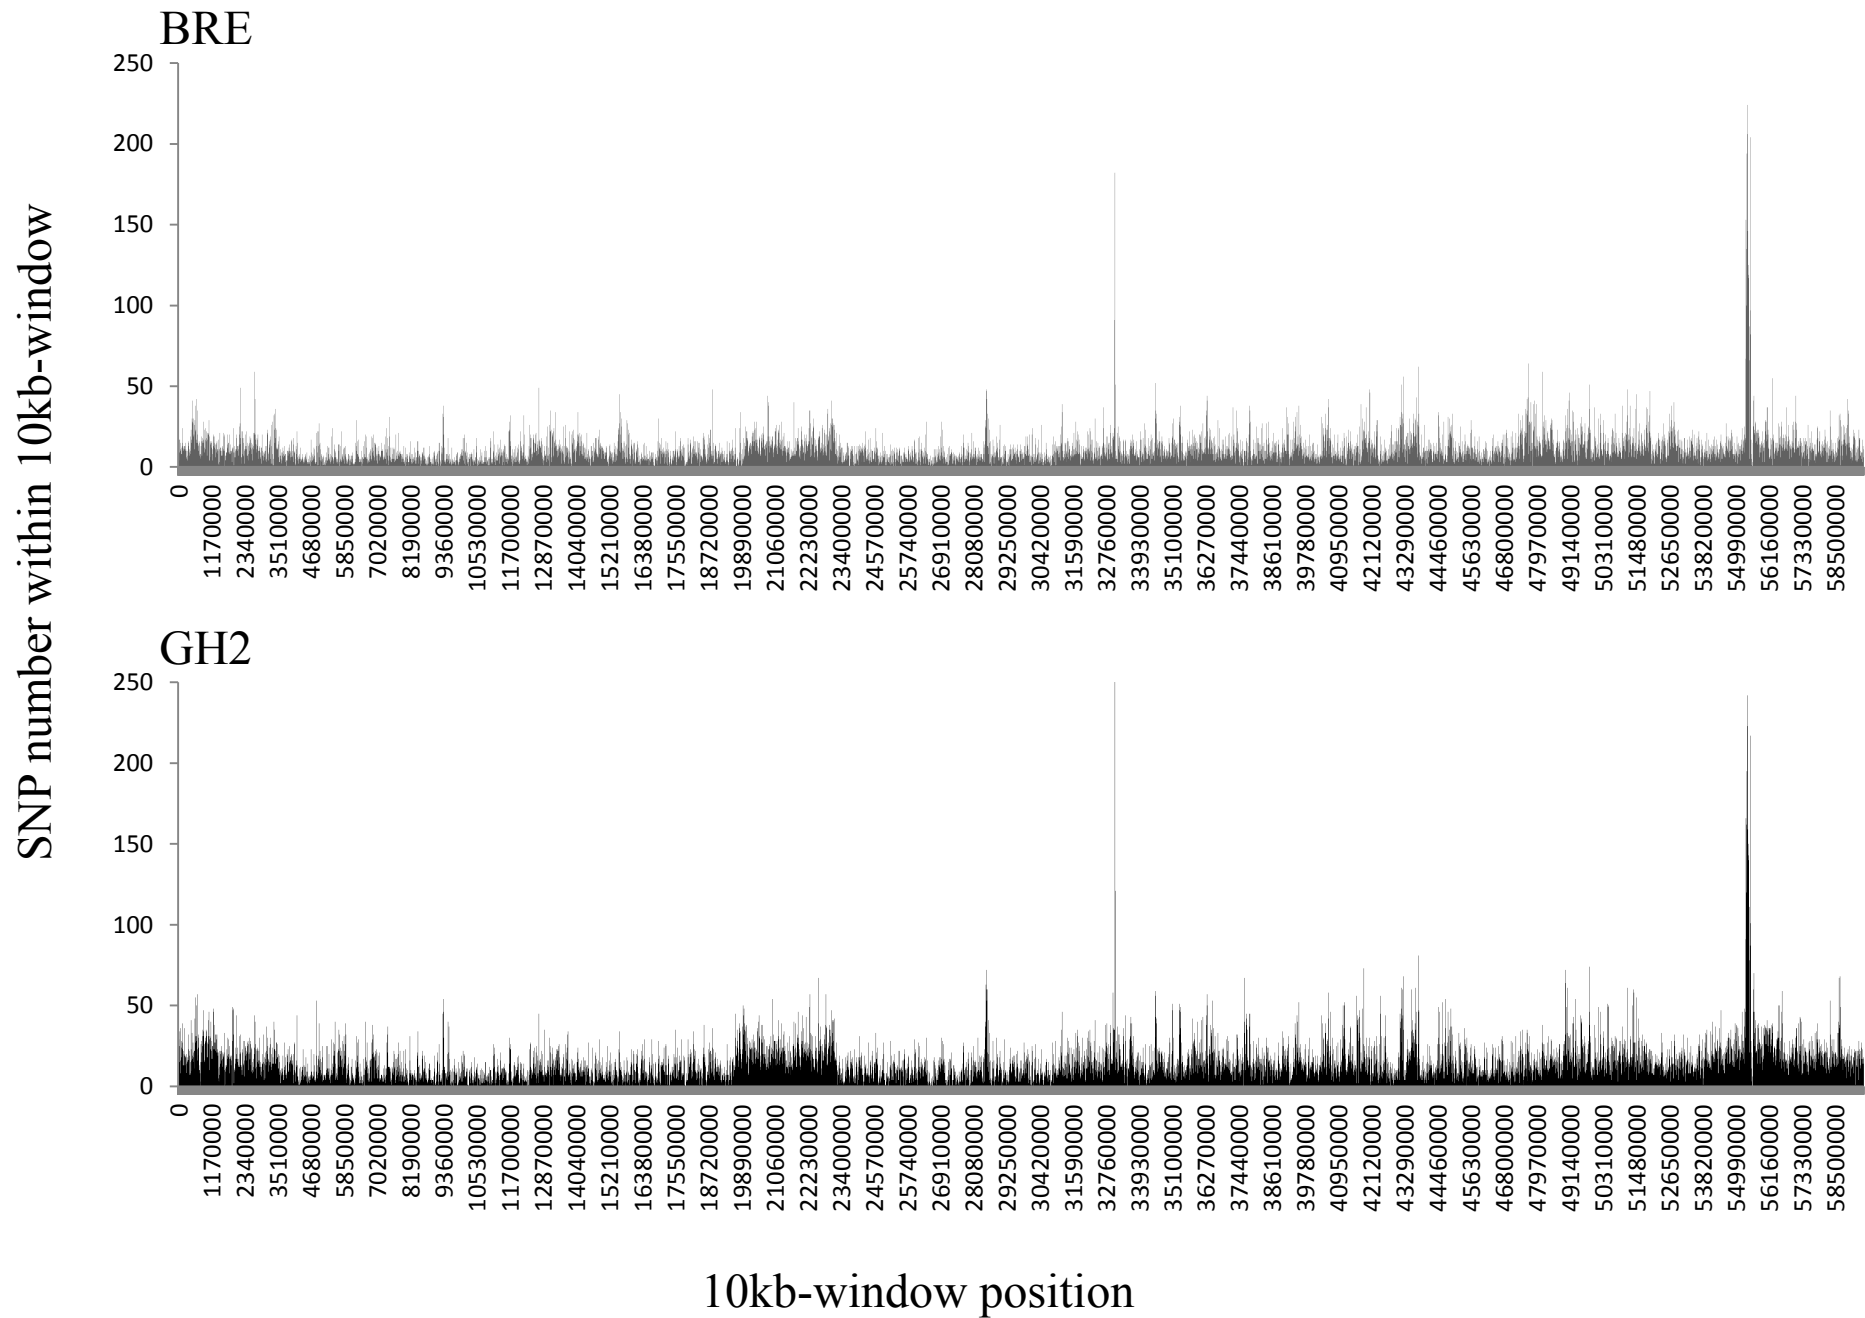

Supplement: pntd.0002591.s003.pdf [file pntd.0002591.s003.pdf]
