# Supplementary material for: Private Selective Sweeps Identified from Next-Generation Pool-Sequencing Reveal Convergent Pathways under Selection in Two Inbred Schistosoma mansoni Strains
Source: PubMed Central journal article supplement (PMC3861164; doi:10.1371/journal.pntd.0002591), 2013-12-12
Supplement: pntd.0002591.s006.pdf [file pntd.0002591.s006.pdf]

**Figure S6**

**BRE**

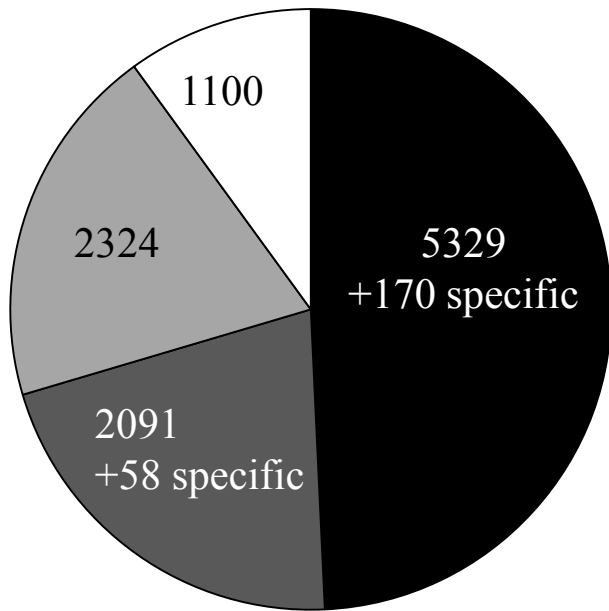

**GH2**

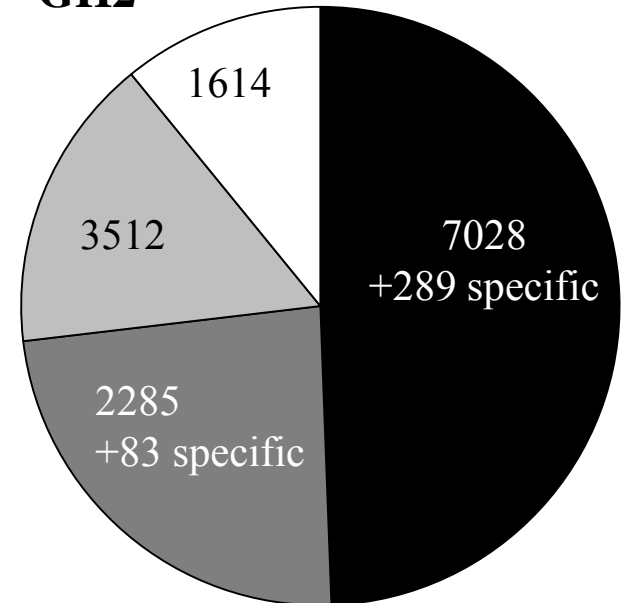

- NonSyn within sweeps
- Syn within sweeps
- NonSyn outside sweeps
- Syn outside sweeps
